# Supplementary material
Source: PubMed Central journal article supplement (PMC8992248)

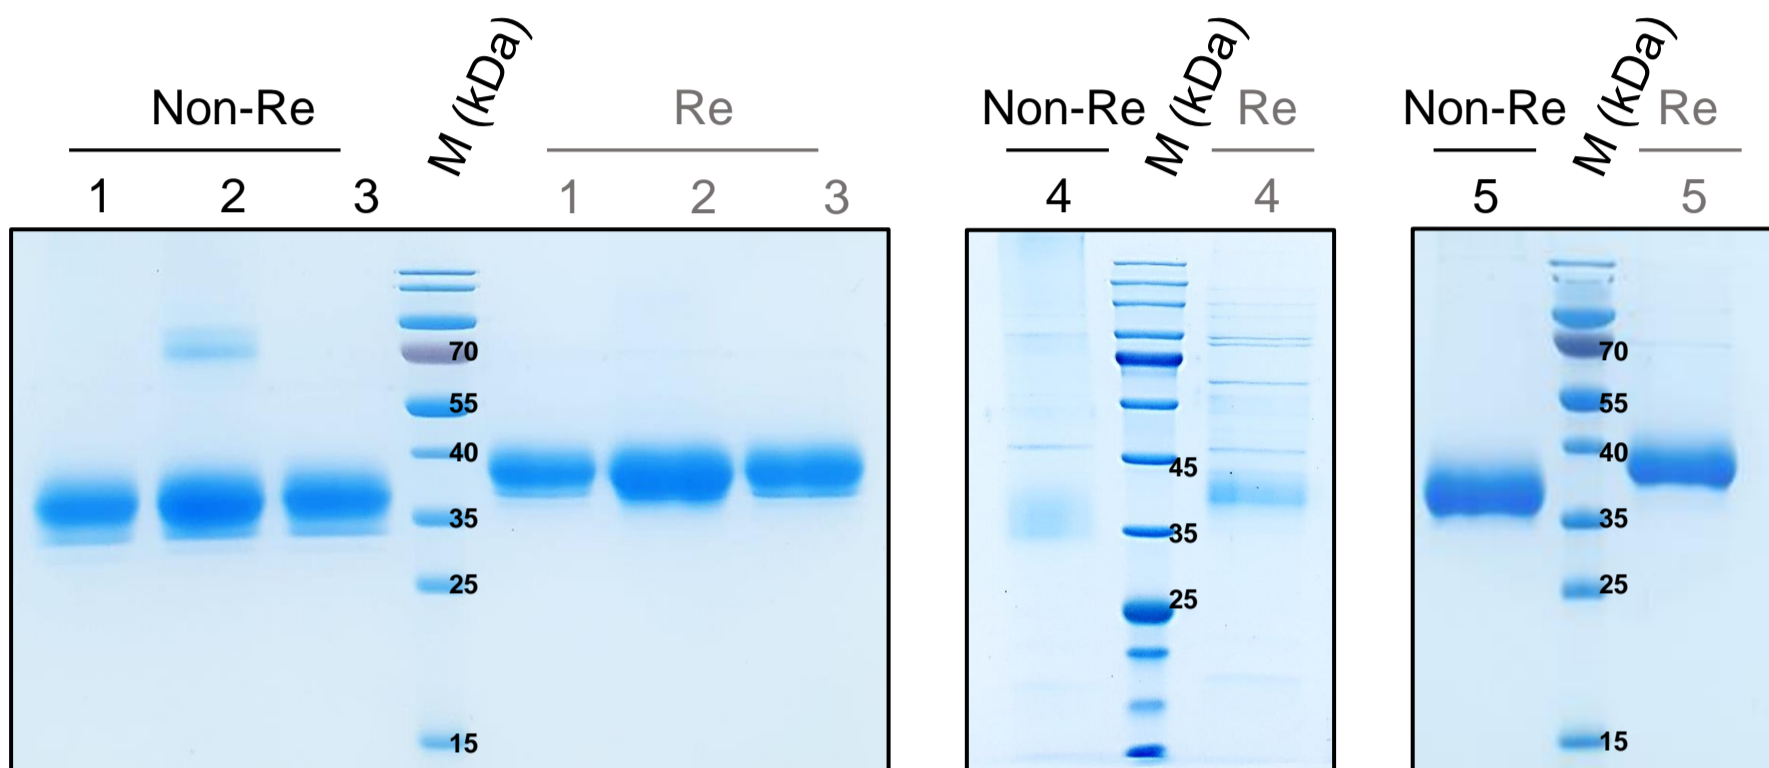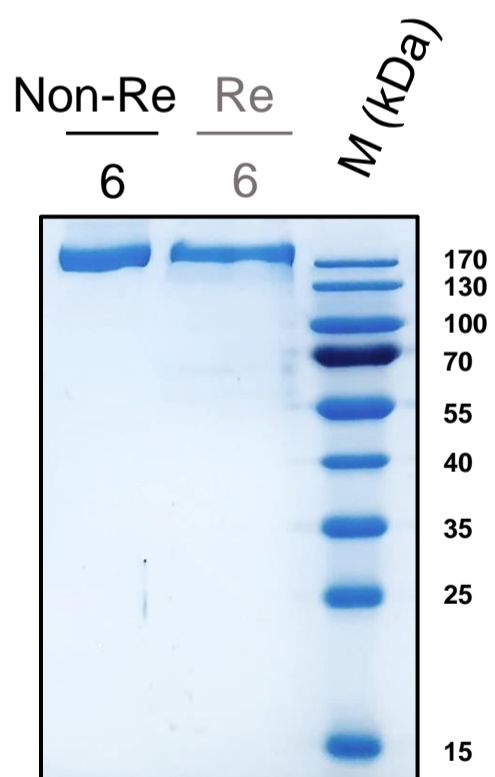

1. RBD Alpha (B.1.1.7, with N501Y mutation)
2. RBD Gamma (P.1, with K417T, E484K, N501Y)
3. RBD Delta (B.1.617.2, with L452R, T478K)
4. RBD Omicron (B. 1.1.529, with G339D, S371L, S373P, S375F, K417N, N440K, G446S, S477N, T478K, E484A, Q493R, G496S, Q498R, N501Y, and Y505H)
5. RBD wild-type
6. D614G spike

## Nucleocapsid

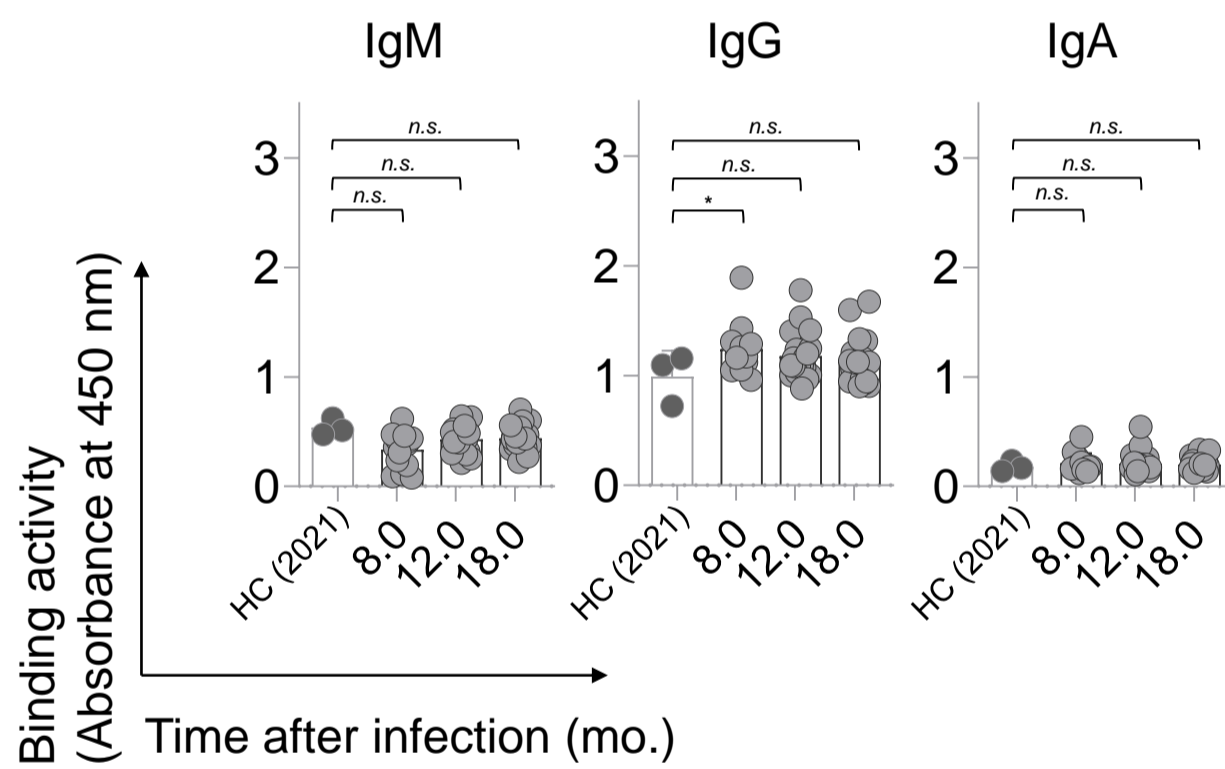

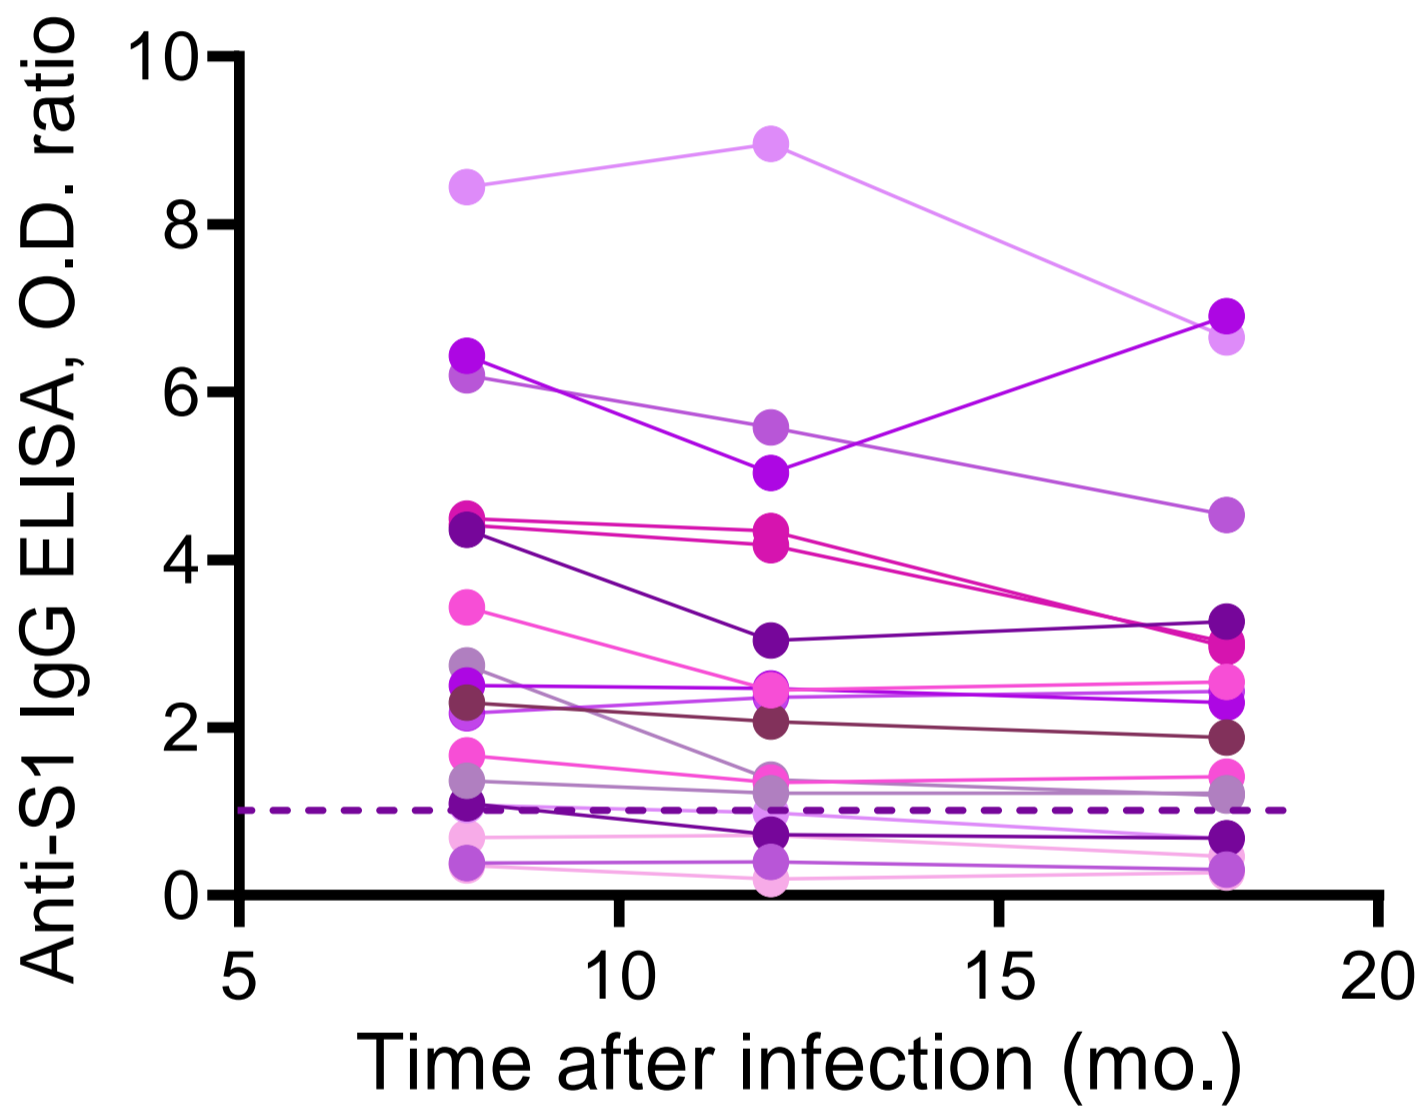

Supplement: jiac099_suppl_supplementary_material.pdf [file jiac099_suppl_supplementary_material.pdf]
